# Supplementary material for: Alleles Causing Resistance to Isoxaben and Flupoxam Highlight the Significance of Transmembrane Domains for CESA Protein Function
Source: PubMed Central journal article supplement (PMC6118223; doi:10.3389/fpls.2018.01152), 2018-08-24
Supplement: Image_2.pdf [file Image_2.pdf]

*cesa3<sup>ixr1-5</sup>*                      *cesa1<sup>fxr2-4</sup>*

↓                                              ↓

|       |                                                                                    |     |
|-------|------------------------------------------------------------------------------------|-----|
| CESA8 | <u>SYRIVIIIMRLIILALFFNYRITHPVDSAYGLWLTSV</u> ICEIWF <del>AVSWVLDQ</del> FPKWSPINRE | 241 |
| CESA5 | <u>PYRMLIVLRLVILGLFFHYRILHPVNDAYALWLI</u> SVICEIWF <del>AVSWVLDQ</del> FPKWYPIERE  | 321 |
| CESA6 | <u>PYRMLIVLRLVILGLFFHYRILHPVKDAYALWLI</u> SVICEIWF <del>AVSWVLDQ</del> FPKWYPIERE  | 333 |
| CESA2 | <u>PYRMLILCRLAILGLFFHYRILHPVNDAYGLWL</u> TSVICEIWF <del>AVSWILDQ</del> FPKWYPIERE  | 334 |
| CESA9 | <u>PYRMLIFCRLAILGLFFHYRILHPVNDAGLWL</u> TSVICEIWF <del>AVSWILDQ</del> FPKWYPIERE   | 339 |
| CESA4 | <u>PYRIVIVLRLVILVFFFRFRILTPAKDAYPLWL</u> ISVICEIWF <del>FALSWILDQ</del> FPKWFPINRE | 272 |
| CESA1 | <u>PYRVVILRLIILCFFLQYRTHPVKNAYPLWL</u> TVICEIWF <del>AFSWILDQ</del> FPKWYPIERE     | 332 |
| CES10 | <u>PYRIVIVLRLIILGVFLHYRTHPVKDAYALWL</u> TSVICEIWF <del>AFSWILDQ</del> FPKWYPIERE   | 319 |
| CESA3 | <u>PYRMVIMLRLVILCLFLHYHITNPVPNAFALWL</u> SVICEIWF <del>FALSWILDQ</del> FPKWFPVNRE  | 316 |
| CESA7 | <u>PYRMVIVARLVILAVFLRYRLNPNVHDALGL</u> WLTSVICEIWF <del>AVSWILDQ</del> FPKWYPIERE  | 295 |

\*\*::\*. \*\* \*\* .\*:.\* \* . \* \*\* \*\*\*\*\*.\*\*:\*\*\*\*\* \*:\*\*

*cesa3<sup>ixr1-6</sup>*

↓

|       |                                                                       |     |
|-------|-----------------------------------------------------------------------|-----|
| CESA8 | <b>S</b> DDGAAMLSFESLVEADFAKRWVPFCKKYSIEPRAPEFYFSLKIDYLRDKVQPSFVKER   | 361 |
| CESA5 | <b>S</b> DDGAAMLTFEALSETAEFARKWVPFCKKYTIEPRAPEWYFCHKMDYLKNKVHPAFVRER  | 441 |
| CESA6 | <b>S</b> DDGAAMLTFEALSETAEFARKWVPFCKKYCIEPRAPEWYFCHKMDYLKNKVHPAFVRER  | 453 |
| CESA2 | <b>S</b> DDGAAMLTFEALSDTAEFARKWVPFCKKFSIEPRAPEWYFSQKMDYLKNKVHPAFVRER  | 454 |
| CESA9 | <b>S</b> DDGAAMLTFEALSYTAEFARKWVPFCKKFSIEPRAPEWYFSQKMDYLKHKVDPAFVNER  | 459 |
| CESA4 | <b>S</b> DDGASMLLFDTLSETSEFARRWVPFCKKYNVEPRAPEFYFSEKIDYLDKDKVQTFVKDR  | 392 |
| CESA1 | <b>S</b> DDGSAMLTFEALSETAEFAKKWVPFCKKFNIEPRAPEFYFAQKIDYLDKDKIQPSFVKER | 452 |
| CES10 | <b>S</b> DDGSAMLTFEALSETAEFSKKWVPFCKKFNIEPRAPEFYFSQKIDYLDKDKIQPSFVKER | 439 |
| CESA3 | <b>F</b> DDGAAMLSFESLAETSEFARKWVPFCKKYSIEPRAPEWYFAAKIDYLDKDKVQTSFVKDR | 436 |
| CESA7 | <b>S</b> DDGASMLTFEALSETAEFARKWVPFCKKFSIEPRAPEMYFTLKVDYLQDKVHPTFVKER  | 415 |

\*\*\*:.\* \*\* \*:.\* \*:.\*:.\*:\*\*\*\*\*: \*\*\*\*\* \*\* \*:\*\*\*:.\*: . \*\* :\*

*cesa3<sup>ixr1-4</sup>*

↓

|       |                                                                       |     |
|-------|-----------------------------------------------------------------------|-----|
| CESA8 | LTGFKMHCRCGWSIYCMPLRPAFKGSAPINLSDRLH <b>QVLR</b> WALGSVEIFLSRHCPWLYGC | 744 |
| CESA5 | LTGFKMHSRGWSVYCTPKIPAFKGSAPINLSDRLH <b>QVLR</b> WALGSVEIFLSRHCPWLYGY  | 831 |
| CESA6 | LTGFKMHSRGWSVYCTPKLAAPKGSAPINLSDRLH <b>QVLR</b> WALGSVEIFLSRHCPWLYGY  | 846 |
| CESA2 | LTGFKMCHRGWSVYCMKRAAFKGSAPINLSDRLH <b>QVLR</b> WALGSVEIFLSRHCPWLYGY   | 845 |
| CESA9 | LTGFKMCHRGWSVYCMKRAAFKGSAPINLSDRLH <b>QVLR</b> WALGSVEIFLSRHCPWLYGY   | 849 |
| CESA4 | LTGFRMHCRCGWSVYCMKRPAPKGSAPINLSDRLH <b>QVLR</b> WALGSVEIFFSRHCPWLYAW  | 809 |
| CESA1 | LTGFKMHARGWISIYCNPPRPAFKGSAPINLSDRLN <b>QVLR</b> WALGSIEILLSRHCPWLYGY | 841 |
| CES10 | LTGFKMHARGWISIYCVSRPAFKGSAPINLSDRLN <b>QVLR</b> WALGSIEILLSRHCPWLYGY  | 828 |
| CESA3 | LTGFKMHARGWRSIYCMKLPAPKGSAPINLSDRLN <b>QVLR</b> WALGSVEILFSRHCPWLYGY  | 826 |
| CESA7 | LTGFKMHCRCGWSIYCMKRPAPKGSAPINLSDRLN <b>QVLR</b> WALGSVEIFFSRHSPLWLYGY | 787 |

\*\*\*:.\*:.\* \*:.\* \* \*\*\*\*\*:\*\*\*\*\*:\*\*\*:.\*:.\*:.\*

*cesa3<sup>ixr1-2</sup>*

↓

|       |                                                                      |     |
|-------|----------------------------------------------------------------------|-----|
| CESA8 | <u>SIILTSVLELRWSGVSIEDLWRNEQFVWIGG</u> SAHLFAVFQGLKMLAGLDTNFTVTSKT   | 864 |
| CESA5 | <u>SIIVTGILEMQWGKVGIDDWRNEQFVWIGG</u> SAHLFALFQGLLKVLAVGVTNFTVTSKA   | 950 |
| CESA6 | <u>SIIVTGILEMQWGKVGIDDWRNEQFVWIGG</u> SAHLFALFQGLLKVLAVGVTNFTVTSKA   | 965 |
| CESA2 | <u>SIIVTGILEMQWGKVGIDDWRNEQFVWIGG</u> ASSHLFALFQGLLKVLAVGVTNFTVTSKA  | 964 |
| CESA9 | <u>SIIVTGILEMQWGKIGIDDWRNEQFVWIGG</u> VSSHLFALFQGLLKVLAVGVTNFTVTSKA  | 968 |
| CESA4 | <u>SIIVTATILELRWSGVSIEDLWRNEQFVWIGG</u> SAHLFAVFQGLLKVLAVGVTNFTVTSKG | 928 |
| CESA1 | <u>SIIVTGILELRWSGVSIEDWRNEQFVWIGG</u> TSAHLFAVFQGLLKVLAVGVTNFTVTSKA  | 960 |
| CES10 | <u>SIIVTATILELRWSGVSIEDWRNEQFVWIGG</u> TSAHLFAVFQGLLKVLAVGVTNFTVTSKA | 947 |
| CESA3 | <u>SIIVTATILEMRWSGVGIDEWRNEQFVWIGG</u> SAHLFAVFQGLLKVLAVGVTNFTVTSKA  | 945 |
| CESA7 | <u>SIIVTATILELRWSGVSIIEWRNEQFVWIGG</u> ISAHLFAVVOGLLKVLAVGVTNFTVTSKA | 907 |

\*\* :.\*:.\*:.\* :.\*:.\* \*\*\*\*\* \*:\*\*\*:.\*:.\*:.\* :.\*:\*\*\*\*\*

*cesa6<sup>ixr2-2</sup>/cesa3<sup>fxr1-3</sup>* *cesa1<sup>ixr2-2</sup>*

*cesa1<sup>ixr2-3</sup>*

CESA8 A--DDLEFGELYIVKWTLLIPPTSLIIINLVGVVAGFSDALNKGYEAWGPLFGKVFVFAF 922  
 CESA5 A--DDGEFSELYIFKWTSLIPPTLLIIINVIGVIVGISDAISNGYDSWGPLFGRLFFAF 1008  
 CESA6 A--DDGEFSDLYLFKWTSLIPPTLLIIINVIGVIVGVFDAISNGYDSWGPLFGRLFFAF 1022  
 CESA9 A--DDGEFSELYIFKWTSLIPPTLLIIINVIGVIVGVSDAINNGYDSWGPLFGRLFFAF 1026  
 CESA4 ASDEADDFGDLYLKWTLLIPPTLLIILNMVGVVAGVSDAINNGYGSWGPLFGKLFFAF 988  
 CESA1 -TDEDGDFAELYIFKWTALLIPPTVLLVNLIGIVAGVSYAVNSGYQSWDLLFGKLFFAF 1019  
 CES10 -SDEGDFAELYVFKWTSLIPPTTILLVNLVIGIVAGVSYAINSGYQSWGPLMGKLLFFAF 1006  
 CESA3 -SDEGDFAELYLFKWTLLIPPTTLLIIVNLVGVVAGVFYAINSGYQSWGPLFXKLFFAF 1004  
 CESA7 -TD--DDDFGELYAFKWTLLIPPTVLIINIVGVVAGISDAINNGYQSWGPLFGKLFFSF 965

\*.:\*\* .\*\*\*:\*\*\*\*\* :::::\*\*\*:\*. \* \*..\*\* :\*\*\*\*:\*:::\*

*cesa1<sup>ixr2-1</sup> (R)/cesa3<sup>ixr1-1</sup> (D)/ixr1-3 (R)*

*cesa6<sup>ixr2-1</sup>*

CESA8 WVILHLYPFLKGLMGRQNRPTIVILWSILLASVFSLVWVRINPFVSKTDTTSL---LN 979  
 CESA5 WVILHLYPFLKGLLGKQDRMPTIILVWSILLASILTLLWVRVNPVFAK-GGPILEICGLD 1067  
 CESA6 WVIHLYPFLKGLLGKQDRMPTIIVVWSILLASILTLLWVWNPNPFAK-GGPVLEICGLN 1081  
 CESA9 WVIVHLYPFLKGLLGKQDRVPTIILVWSILLASILTLLWVRVNPVSK-DGPVLEICGLD 1085  
 CESA4 WVIVHLYPFLKGLMGRQNRPTIVVLSILLASIFSLVWVRIDPFLPKQTGPLLKQCGVD 1048  
 CESA1 WVIAHLYPFLKGLLGRQNRPTIVIVWSVLLASIFSLWVRINPFVDANPNA-NNFNGKG 1078  
 CES10 WVVAHLYPFLKGLLGRQNRPTIVIVWSALLASIFSLWVRINPFVSTTGVMSNSFMGE- 1065  
 CESA3 WVIVHLYPFLKGLMGRQNRPTIVVWSVLLA**FIFLL**WVRIDPFTSRVTGPDILECGIN 1064  
 CESA7 WVIVHLYPFLKGLMGRQNRPTIVVIWSVLLASIFSLWVRIDPFLKTKGPDTSKCGIN 1025

\*\* : \*\*\*\*\*:\*:\*: \*\*::\*\* \*\*:::\*::\*\*::\*\*::\*\*

*cesa3<sup>fxr1-2</sup>* *cesa3<sup>fxr1-1</sup>*
